# Supplementary material
Source: PubMed Central journal article supplement (PMC4472324)
Supplement: cir-131-2194-s001.pdf [file cir-131-2194-s001.pdf]

# Supplemental Material

Efficacy of Chronic  $\beta$ -Blocker Therapy for Secondary Prevention on Long-term Outcomes After Coronary Artery Bypass Grafting Surgery

## Contents

### I Supplemental Methods

**Revascularization procedures**

**Outcome definitions**

**Contraindications to  $\beta$ -blocker therapy**

### II Supplemental Tables

**Table S1.** Candidate Risk Factors

**Table S2.** Baseline Demographic, Biochemical, and Procedural Characteristics of the Patients According to Pattern of  $\beta$ -Blocker Use

**Table S3.** Concomitant Medication Use at Hospital Discharge and at 1 Year after CABG

**Table S4.** Influence of Prior MI on Long-term Outcomes after CABG

**Table S5.** Unadjusted Long-term Outcomes According to Pattern of  $\beta$ -Blocker Use in the Overall Population, Patients without, and Patients with Prior Myocardial Infarction

**Table S6.** Outcomes in Pre-specified Subgroups

**Table S7.** Baseline Demographic and Procedural Characteristics of the Propensity-score Matched Cohorts

**Table S8.** Sensitivity Analysis using  $\beta$ -Blocker Use as A Time-Dependent Covariate

**Table S9.** Sensitivity Analysis in Patients without Contraindications to  $\beta$ -Blocker Therapy

### III Supplemental Figures

**Figure S1.** Patient flowchart.

MI indicates myocardial infarction.

**Figure S2.** Distribution of  $\beta$ -blocker categories in the overall population, patients with, and patients without prior MI.

Abbreviations as in Figure S1.

**Figure S3.** Trends in  $\beta$ -blocker categories distribution for the years 2004 to 2008.

**Figure S4.** Kaplan-Meier curves of outcomes (except for all-cause death and MACCE) associated with  $\beta$ -blocker use after CABG in the overall population. Shown are rates of cardiac death (Panel A), MI (Panel B), stroke (Panel C), and repeat revascularization (Panel D). The *P* values were calculated using the log-rank test on the basis of all available follow-up data with always users as reference.

Abbreviations as in Figure S1.

**Figure S5.** Kaplan-Meier curves of outcomes associated with  $\beta$ -blocker use after CABG in propensity score-matched cohort analysis. Rates of all-cause death and MACCE in the matched cohort are shown among always users and inconsistent users (Panel A and B), and among always users and never users (Panel C and D). The *P* values were calculated by means of the log-rank test on the basis of all available follow-up data with always users as reference.

MACCE indicates major adverse cardiac and cerebrovascular events.

## **Supplemental Methods**

### **Revascularization procedures**

As part of standard institutional requirements, all surgeons had to have specialized in congenital or valve heart surgery for more than 3 years before undertaking any CABG procedures. With respect to off-pump CABG, the surgeon had to perform at least 100 on-pump CABG procedures before being considered qualified to carry out the off-pump procedure. Once qualified, the choice of off-pump CABG as opposed to on-pump CABG for a particular patient was generally at the discretion of the individual surgeons.

Anesthesia was managed by inhalation of isoflurane with the addition of fentanyl or sufentanil, and propofol was administered continuously until the end of the procedure if necessary. Surgical revascularization was performed using standard bypass techniques. For on-pump CABG, a standard cardiopulmonary bypass was established, and moderate systemic hypothermia (28°C to 32°C) and perfusion with antegrade intermittent cold crystalloid cardioplegia were used. Heparin was given to achieve activated clotting times of 480 seconds or above before institution of cardiopulmonary bypass. For off-pump CABG, stabilization devices were used to provide a motionless anastomosis site, and heparin was administered before the start of the first distal anastomosis to achieve an activated clotting time of 300 to 350 seconds. On-pump CABG involved aortic cross-clamping and cardioplegic arrest, while off-pump CABG was performed with a partial occlusion clamp. Whenever possible, complete revascularization was attempted, and the internal thoracic artery was used preferentially for revascularization of the left anterior descending artery. The remaining vessels were to be bypassed either using another arterial conduit or the saphenous vein in the configuration decided by the surgeon. During reperfusion, the

bypass grafting was completed with proximal anastomoses to the ascending aorta. The decision to switch to cardiopulmonary bypass during the procedure was based on significant hemodynamic instability or ventricular arrhythmia. After separation from cardiopulmonary bypass or on completion of all anastomoses, protamine was given to reverse the effects of heparin. Postoperatively, starting within the first 24 hours, aspirin therapy (100 mg/d) is recommended and should be continued indefinitely.

## **Definitions**

**Death** was defined as death from any cause.

**Myocardial infarction** occurred when there were clinical signs and symptoms of ischemia that were distinct from the presenting ischemic event and meeting at least 1 of the following criteria:

1. Spontaneous (before or without revascularization, >48 h after CABG):

A. New, significant Q waves in at least 2 contiguous leads of an ECG that were not present with the presenting ischemic event;

B. Patients whose most recent cardiac markers measured before reinfarction, which were normal, require an increase in CK-MB or troponin that is above the 99<sup>th</sup> percentile upper limit of normal and at least  $\geq 20\%$  above the most recent value.

2. Within 48 h after CABG:

A CABG-related MI was defined by elevation of cardiac biomarker values >10 times the 99<sup>th</sup> percentile upper reference limit in patients with normal baseline cardiac troponin values ( $\leq 99^{\text{th}}$  percentile upper reference limit) plus either new pathological Q waves; new left bundle-branch block, angiographically documented new graft, or native coronary artery occlusion; or imaging evidence of new loss of viable myocardium or new regional wall motion abnormality.

**Stroke** was confirmed by a neurologist on the basis of imaging studies and was defined as follows:

1. A focal neurologic deficit of central origin lasting >72 hours, or

2. A focal neurologic deficit of central origin lasting >24 hours, with imaging evidence of cerebral infarction or intracerebral hemorrhage, or

3. A non-focal encephalopathy lasting >24 hours with imaging evidence of cerebral infarction or hemorrhage adequate to account for the clinical state.

Retinal arterial ischemia or hemorrhage was included in the definition of stroke.

**Repeat revascularization** was defined as any repeat CABG or percutaneous coronary intervention.

### **Contraindications to $\beta$ -blocker therapy**

1. Allergic to  $\beta$ -blockers, or
2. Left ventricular ejection fraction  $<35\%$ , pulmonary edema, or congestive heart failure, or
3. Bradycardia (heart rate  $<50$  bpm) on admission without taking a  $\beta$ -blocker, or
4. Hypotension or cardiogenic shock during hospitalization or systolic BP  $<100$  mm Hg, or
5. Conduction disorder including second and third degree heart block, bifascicular block, or trifascicular block, and with no pacemaker implanted, or
6. History of asthma or chronic obstructive pulmonary disease, or
7. Metastatic cancer or other terminal illness, or
8. Other reasons documented by a physician for not giving  $\beta$ -blockers.

## Supplemental Tables

### Supplemental Table S1. Candidate Risk Factors

| Risk Factors              |                                       |                                             |
|---------------------------|---------------------------------------|---------------------------------------------|
| 1. Age                    | 12. CHF                               | 23. LIMA-to-LAD graft                       |
| 2. Sex                    | 13. Previous PCI                      | 24. Complete revascularization‡             |
| 3. BMI*                   | 14. Previous cardiac surgery          | 25. Year of procedure§                      |
| 4. Smoker                 | 15. LVEF                              | 26. No. of surgeries performed by surgeons¶ |
| 5. Diabetes mellitus      | 16. Three-vessel disease              | 27. $\beta$ -Blocker use pattern            |
| 6. Dyslipidemia           | 17. Left main CAD                     | 28. Use of aspirin at 1 year                |
| 7. Hypertension           | 18. Previous MI†                      | 29. Use of ACEI or ARB at 1 year            |
| 8. COPD                   | 19. Preoperative intravenous nitrates | 30. Use of statins at 1 year                |
| 9. PVD                    | 20. Preoperative IABP                 | 31. Use of CCB at 1 year                    |
| 10. Previous CVA          | 21. Status of surgery                 | 32. Use of diuretics at 1 year              |
| 11. Chronic renal failure | 22. Cardiopulmonary bypass            | 33. Use of nitrates at 1 year               |

BMI indicates body mass index; COPD, chronic obstructive pulmonary disease; PVD, peripheral vascular disease; CVA, cerebrovascular accident; CHF, chronic heart failure; PCI, percutaneous coronary intervention; LVEF, left ventricular ejection fraction; CAD, coronary artery disease; MI, myocardial infarction; IABP, intra-aortic balloon pump; LIMA, left internal mammary artery; LAD, left anterior descending; ACEI, angiotensin-converting enzyme inhibitor; ARB, angiotensin receptor blocker; CCB, calcium channel blocker.

\*Calculated as weight in kilograms divided by height in meters squared.

†Previous MI was included in the overall cohorts and in the propensity score calculation as a covariate in the matched cohorts.

‡An index of completeness of revascularization (ICOR) was defined as the ratio of the total number of distal vessels bypassed to the number of diseased territories reported on the preoperative coronary angiographic results. A revascularization with an ICOR  $\geq 1$  was considered complete revascularization.

§Year of surgery was included in the multivariable regression model as each class indicating a calendar of year.

¶Surgeons were grouped into tertiles according to the surgical volume (<250 cases, 250–500 cases, and >500 cases).



**Supplemental Table S2. Baseline Demographic, Biochemical and Procedural Characteristics of the Patients According to their Pattern of  $\beta$ -Blocker Use\***

| Variable                          | Always Users<br>n=2922 | Inconsistent Users<br>n=1681 | Never Users<br>n=1323 |
|-----------------------------------|------------------------|------------------------------|-----------------------|
| <b>Demographics</b>               |                        |                              |                       |
| Age, mean (SD), y                 | 60.5 (8.9)             | 60.5 (9.3)                   | 61.9 (9.0)            |
| Male sex                          | 2376 (81)              | 1379 (82)                    | 1076 (81)             |
| BMI, mean (SD), kg/m <sup>2</sup> | 24.7 (2.8)             | 24.6 (2.9)                   | 25.3 (2.8)            |
| <b>Medical history</b>            |                        |                              |                       |
| Smoker                            | 1564 (54)              | 915 (54)                     | 673 (51)              |
| Diabetes mellitus                 | 950 (33)               | 503 (30)                     | 379 (29)              |
| Insulin-treated diabetes          | 221 (8)                | 109 (7)                      | 69 (5)                |
| Hypertension                      | 1952 (67)              | 955 (57)                     | 915 (69)              |
| Dyslipidemia                      | 1936 (66)              | 991 (59)                     | 560 (42)              |
| Peripheral vascular disease       | 51 (2)                 | 73 (4)                       | 174 (13)              |
| Previous CVA                      | 230 (8)                | 146 (9)                      | 85 (6)                |
| COPD                              | 15 (1)                 | 62 (4)                       | 167 (13)              |
| Chronic renal failure             | 24 (1)                 | 17 (1)                       | 12 (1)                |
| Prior myocardial infarction       | 1280 (44)              | 690 (41)                     | 544 (41)              |
| Prior PCI                         | 312 (11)               | 167 (10)                     | 108 (8)               |
| Prior cardiac surgery             | 12 (1)                 | 7 (1)                        | 5 (1)                 |
| Congestive heart failure          | 180 (6)                | 85 (5)                       | 31 (2)                |
| Recent atrial fibrillation        | 58 (2)                 | 43 (3)                       | 35 (3)                |
| Unstable angina                   | 451 (15)               | 157 (9)                      | 99 (8)                |
| NYHA class IV                     | 68 (2)                 | 46 (3)                       | 29 (3)                |
| LVEF, mean (SD), %                | 60 (9)                 | 60 (9)                       | 60 (9)                |
| <b>No. of diseased vessels</b>    |                        |                              |                       |
| 2                                 | 290 (10)               | 184 (11)                     | 165 (13)              |
| 3                                 | 2571 (88)              | 1454 (87)                    | 1112 (84)             |
| Left main CAD                     | 1005 (34)              | 526 (31)                     | 441 (33)              |
| <b>Status</b>                     |                        |                              |                       |
| Elective                          | 2883 (99)              | 1660 (99)                    | 1296 (98)             |
| Urgent                            | 39 (1)                 | 21 (1)                       | 27 (2)                |
| EuroSCORE, mean (SD)              | 2.8 (2.0)              | 2.8 (2.1)                    | 3.1 (2.2)             |

| <b>Biochemical characteristics</b>              |             |             |             |
|-------------------------------------------------|-------------|-------------|-------------|
| <b>Creatinine, <math>\mu\text{mol/L}</math></b> | 84.2 (20.4) | 85.7 (22.1) | 86.5 (20.5) |
| <b>Triglycerides, mg/dL</b>                     | 1.7 (1.0)   | 1.8 (1.1)   | 1.7 (0.9)   |
| <b>Total cholesterol, mg/dL</b>                 | 4.5 (1.1)   | 4.5 (1.1)   | 4.6 (1.3)   |
| <b>HDL cholesterol, mg/dL</b>                   | 1.1 (0.4)   | 1.1 (0.3)   | 1.1 (0.3)   |
| <b>LDL cholesterol, mg/dL</b>                   | 2.5 (0.9)   | 2.5 (0.9)   | 2.5 (1.1)   |
| <b>Total albumin, g/L*</b>                      | 41.0 (4.4)  | 40.9 (4.5)  | 40.7 (4.8)  |
| <b>hsCRP, mg/L*</b>                             | 3.1 (3.6)   | 3.4 (3.8)   | 3.1 (3.7)   |
| <b>Procedural characteristics</b>               |             |             |             |
| <b>Grafts per patient, mean (SD), n</b>         | 3.4 (0.9)   | 3.3 (0.9)   | 3.1 (0.9)   |
| <b>Off-pump procedure</b>                       | 1426 (49)   | 1083 (64)   | 1133 (86)   |
| <b>LIMA-to-LAD graft</b>                        | 2788 (95)   | 1590 (95)   | 1244 (94)   |
| <b>Complete revascularization</b>               | 2708 (93)   | 1535 (91)   | 1160 (88)   |

HDL indicates high density lipoprotein; LDL, low density lipoprotein; hsCRP, high-sensitivity C-reactive protein. Other abbreviations as in Table S1.

Values expressed as number (percentage) unless otherwise indicated.

\*Data are available only for participants recruited since 2006.

*Supplemental Table S3. Concomitant Medication Use at Hospital Discharge and at 1 Year after CABG*

| Medications        | Hospital Discharge     |                       |                    | 1 Year after Procedure |                       |                    |
|--------------------|------------------------|-----------------------|--------------------|------------------------|-----------------------|--------------------|
|                    | All patients<br>n=5973 | No prior MI<br>n=3431 | Prior MI<br>n=2542 | All patients<br>n=5926 | No prior MI<br>n=3412 | Prior MI<br>n=2514 |
| <b>β-Blocker</b>   | 69                     | 69                    | 69                 | 61                     | 59                    | 63                 |
| <b>Aspirin</b>     | 76                     | 75                    | 77                 | 86                     | 88                    | 85                 |
| <b>ACEI or ARB</b> | 11                     | 11                    | 11                 | 28                     | 27                    | 30                 |
| <b>CCB*</b>        | 20                     | 22                    | 18                 | 55                     | 54                    | 56                 |
| <b>Statins†</b>    | -                      | -                     | -                  | 31                     | 32                    | 28                 |
| <b>Diuretics†</b>  | -                      | -                     | -                  | 5                      | 4                     | 7                  |
| <b>Nitrates†</b>   | -                      | -                     | -                  | 66                     | 65                    | 67                 |

Abbreviations as in Table S1.

Values expressed as percentage.

\*Data at hospital discharge are available only for participants recruited since 2006.

†Data at hospital discharge are not available for the years from 2004 to 2008.

*Supplemental Table S4. Influence of Prior MI on Long-term Outcomes after CABG*

|                                 | No. (%) of Events     |                    | Unadjusted HR*<br>(95% CI) | P Value | Adjusted HR*<br>(95% CI) | P Value |
|---------------------------------|-----------------------|--------------------|----------------------------|---------|--------------------------|---------|
|                                 | No Prior MI<br>n=3431 | Prior MI<br>n=2542 |                            |         |                          |         |
| <b>All-cause death</b>          | 192 (5.6)             | 170 (6.7)          | 1.22 (0.99–1.50)           | 0.06    | 0.89 (0.65–1.21)         | 0.45    |
| <b>Cardiac death</b>            | 100 (2.9)             | 106 (4.2)          | 1.45 (1.10–1.91)           | 0.01    | 0.88 (0.59–1.31)         | 0.53    |
| <b>Myocardial infarction</b>    | 47 (1.4)              | 51 (2.0)           | 1.49 (1.00–2.22)           | 0.05    | 1.41 (0.91–2.18)         | 0.12    |
| <b>Stroke</b>                   | 363 (10.6)            | 258(10.1)          | 0.97 (0.83–1.14)           | 0.74    | 1.00 (0.79–1.26)         | 0.97    |
| <b>Repeat revascularization</b> | 142 (4.1)             | 96 (3.8)           | 0.93 (0.72–1.21)           | 0.58    | 0.95 (0.65–1.39)         | 0.79    |
| <b>MACCE</b>                    | 677 (19.7)            | 520 (20.5)         | 1.06 (0.94–1.18)           | 0.36    | 0.94 (0.80–1.12)         | 0.49    |

HR indicates hazard ratio; CI, confidence interval; MI, myocardial infarction; MACCE, major adverse cardiac and cerebrovascular events.

The clinical outcomes were ascertained after hospital discharge until the most recent date for which follow-up data were available.

\*The HRs were reported for patients having prior MI with those not having prior MI as reference. Multivariable Cox proportional-hazards regression was used with adjustment for all patient-level variables in Supplemental Table S1.

*Supplemental Table S5. Unadjusted Long-term Outcomes According to Pattern of  $\beta$ -Blocker Use in the Overall Population, Patients with, and Patients without Prior Myocardial Infarction*

|                                  | Always Users              | Inconsistent Users        |                           |         | Never Users               |                           |         |
|----------------------------------|---------------------------|---------------------------|---------------------------|---------|---------------------------|---------------------------|---------|
|                                  | No. of Patients/<br>n (%) | No. of Patients/<br>n (%) | Unadjusted HR<br>(95% CI) | P Value | No. of Patients/<br>n (%) | Unadjusted HR<br>(95% CI) | P Value |
| <b>All Patients</b>              | 2922                      | 1681                      |                           |         | 1323                      |                           |         |
| <b>All-cause death</b>           | 114 (3.9)                 | 111 (6.6)                 | 1.89 (1.46–2.46)          | <0.001  | 90 (6.8)                  | 1.32 (1.00–1.75)          | 0.05    |
| <b>Cardiac death</b>             | 59 (2.0)                  | 64 (3.8)                  | 2.27 (1.64–3.14)          | <0.001  | 47 (3.6)                  | 1.27 (0.86–1.88)          | 0.22    |
| <b>Myocardial infarction</b>     | 37 (1.3)                  | 16 (1.0)                  | 0.83 (0.46–1.50)          | 0.54    | 23 (1.7)                  | 1.07 (0.63–1.81)          | 0.81    |
| <b>Stroke</b>                    | 235 (8.0)                 | 141 (8.4)                 | 1.14 (0.92–1.40)          | 0.23    | 157 (11.9)                | 1.23 (1.00–1.50)          | 0.05    |
| <b>Repeat revascularization</b>  | 100 (3.4)                 | 41 (2.4)                  | 0.77 (0.53–1.10)          | 0.15    | 58 (4.4)                  | 1.06 (0.77–1.47)          | 0.73    |
| <b>MACCE</b>                     | 436 (14.9)                | 288 (17.1)                | 1.20 (1.04–1.40)          | 0.02    | 292 (22.1)                | 1.26 (1.08–1.46)          | 0.003   |
| <b>Patients without Prior MI</b> | 1642                      | 991                       |                           |         | 779                       |                           |         |
| <b>All-cause death</b>           | 63 (3.8)                  | 60 (6.1)                  | 1.72 (1.21–2.45)          | 0.003   | 50 (6.4)                  | 1.17 (0.80–1.71)          | 0.41    |
| <b>Cardiac death</b>             | 33 (2.0)                  | 31 (3.1)                  | 1.71 (1.05–2.79)          | 0.03    | 20 (2.6)                  | 0.84 (0.48–1.48)          | 0.55    |
| <b>Myocardial infarction</b>     | 15 (0.9)                  | 10 (1.0)                  | 1.21 (0.54–2.69)          | 0.65    | 15 (1.9)                  | 1.55 (0.75–3.20)          | 0.24    |
| <b>Stroke</b>                    | 132 (8.0)                 | 84 (8.5)                  | 1.13 (0.86–1.49)          | 0.37    | 88 (11.3)                 | 1.16 (0.88–1.52)          | 0.30    |
| <b>Repeat revascularization</b>  | 53 (3.2)                  | 26 (2.6)                  | 0.86 (0.54–1.38)          | 0.54    | 43 (5.5)                  | 1.39 (0.93–2.09)          | 0.11    |
| <b>MACCE</b>                     | 240 (14.6)                | 167 (16.9)                | 1.20 (0.98–1.46)          | 0.08    | 171 (22.0)                | 1.24 (1.02–1.51)          | 0.04    |
| <b>Patients with Prior MI</b>    | 1280                      | 690                       |                           |         | 544                       |                           |         |
| <b>All-cause death</b>           | 51 (4.0)                  | 51 (7.4)                  | 2.14 (1.45–3.15)          | <0.001  | 40 (7.4)                  | 1.51 (1.00–2.29)          | 0.05    |

|                                 |            |            |                  |      |            |                  |        |
|---------------------------------|------------|------------|------------------|------|------------|------------------|--------|
| <b>Cardiac death</b>            | 26 (2.0)   | 33 (4.8)   | 1.93 (1.12–3.32) | 0.02 | 27 (5.0)   | 2.71 (1.62–4.54) | <0.001 |
| <b>Myocardial infarction</b>    | 22 (1.7)   | 6 (0.9)    | 0.57 (0.23–1.42) | 0.23 | 8 (1.5)    | 0.71 (0.32–1.61) | 0.42   |
| <b>Stroke</b>                   | 103 (8.0)  | 57 (8.3)   | 1.15 (0.83–1.59) | 0.41 | 69 (12.7)  | 1.35 (0.99–1.83) | 0.06   |
| <b>Repeat revascularization</b> | 47 (3.7)   | 15 (2.2)   | 0.65 (0.36–1.16) | 0.14 | 15 (2.8)   | 0.64 (0.36–1.14) | 0.13   |
| <b>MACCE</b>                    | 196 (15.3) | 121 (17.5) | 1.22 (0.97–1.53) | 0.09 | 121 (22.2) | 1.29 (1.03–1.62) | 0.03   |

Abbreviations as in Table S4.

*Supplemental Table S6. Outcomes in Pre-specified Subgroups*

|                        | Always Users    |               | Inconsistent Users |               |                       | <i>P</i> Value for Interaction | Never Users     |               |                       | <i>P</i> Value for Interaction |
|------------------------|-----------------|---------------|--------------------|---------------|-----------------------|--------------------------------|-----------------|---------------|-----------------------|--------------------------------|
|                        | No. of Patients | Events, n (%) | No. of Patients    | Events, n (%) | Adjusted HR* (95% CI) |                                | No. of Patients | Events, n (%) | Adjusted HR* (95% CI) |                                |
| <b>All-cause death</b> |                 |               |                    |               |                       |                                |                 |               |                       |                                |
| <65 years              | 1909            | 45 (2.4)      | 1093               | 48 (4.4)      | 1.76 (1.02–3.05)      | <0.001                         | 763             | 41 (5.4)      | 2.31 (1.51–3.53)      | 0.39                           |
| ≥65 years              | 1013            | 69 (6.8)      | 588                | 63 (10.7)     | 1.73 (1.22–2.47)      |                                | 560             | 49 (8.8)      | 1.15 (0.73–1.80)      |                                |
| No heart failure       | 2742            | 105 (3.8)     | 1615               | 101 (6.3)     | 1.38 (0.97–1.97)      | 0.38                           | 1292            | 86 (6.7)      | 1.89 (1.43–2.50)      | 0.04                           |
| Heart failure          | 180             | 9 (5.0)       | 85                 | 10 (11.8)     | 2.03 (0.48–8.63)      |                                | 31              | 4 (12.9)      | 1.57 (0.28–8.90)      |                                |
| LVEF ≥50%              | 2615            | 90 (3.4)      | 1508               | 93 (6.2)      | 2.06 (1.53–2.78)      | 0.001                          | 1196            | 77 (6.4)      | 1.54 (1.06–2.24)      | 0.15                           |
| LVEF <50%              | 307             | 24 (7.8)      | 173                | 18 (10.4)     | 1.95 (0.96–3.97)      |                                | 127             | 13 (10.2)     | 1.16 (0.47–2.87)      |                                |
| No COPD                | 2907            | 113 (3.9)     | 1619               | 106 (6.5)     | 1.96 (1.49–2.57)      | 0.61                           | 1156            | 78 (6.7)      | 1.39 (0.98–1.97)      | 0.68                           |
| COPD                   | 15              | 1 (6.7)       | 62                 | 5 (8.1)       | 1.57 (0.04–57.06)     |                                | 167             | 12 (7.2)      | 1.98 (0.04–43.70)     |                                |
| No unstable angina     | 2471            | 91 (3.7)      | 1524               | 99 (6.5)      | 1.30 (0.89–1.91)      | 0.54                           | 1224            | 83 (6.8)      | 1.87 (1.40–2.52)      | 0.56                           |
| Unstable angina        | 451             | 23 (5.1)      | 157                | 12 (7.6)      | 2.04 (0.94–4.42)      |                                | 99              | 7 (7.1)       | 1.00 (0.33–3.06)      |                                |
| <b>MACCE</b>           |                 |               |                    |               |                       |                                |                 |               |                       |                                |
| <65 years              | 1909            | 263 (13.8)    | 1093               | 153 (14.0)    | 1.13 (0.91–1.39)      | 0.11                           | 763             | 151 (19.8)    | 1.15 (0.88–1.51)      | <0.001                         |
| ≥65 years              | 1013            | 173 (17.1)    | 588                | 135 (23.0)    | 1.23 (0.93–1.62)      |                                | 560             | 141 (25.2)    | 1.58 (1.25–2.00)      |                                |
| No heart failure       | 2742            | 404 (14.7)    | 1615               | 272 (17.0)    | 1.20 (0.98–1.46)      | 0.71                           | 1292            | 281 (21.7)    | 1.31 (1.12–1.54)      | 0.26                           |
| Heart failure          | 180             | 32 (17.8)     | 85                 | 16 (18.8)     | 1.40 (0.69–2.84)      |                                | 31              | 11 (35.5)     | 1.33 (0.55–3.22)      |                                |

|                                  |      |            |      |            |                  |      |      |            |                  |      |
|----------------------------------|------|------------|------|------------|------------------|------|------|------------|------------------|------|
| <b>LVEF <math>\geq</math>50%</b> | 2615 | 387 (14.8) | 1508 | 258 (17.1) | 1.23 (1.00–1.50) | 0.24 | 1196 | 269 (22.5) | 1.27 (1.08–1.49) | 0.19 |
| <b>LVEF &lt;50%</b>              | 307  | 49 (16.0)  | 173  | 30 (17.3)  | 1.44 (0.87–2.39) |      | 127  | 23 (18.1)  | 0.94 (0.50–1.78) |      |
| <b>No COPD</b>                   | 2907 | 430 (14.8) | 1619 | 279 (17.2) | 1.18 (0.97–1.44) | 0.36 | 1156 | 255 (22.1) | 1.31 (1.12–1.52) | 0.57 |
| <b>COPD</b>                      | 15   | 6 (40.0)   | 62   | 9 (14.5)   | 0.27 (0.05–1.52) |      | 167  | 37 (22.2)  | 0.55 (0.09–3.56) |      |
| <b>No unstable angina</b>        | 2471 | 351 (14.2) | 1524 | 253 (16.6) | 1.13 (0.92–1.40) | 0.28 | 1224 | 275 (22.5) | 1.23 (1.04–1.45) | 0.16 |
| <b>Unstable angina</b>           | 451  | 85 (18.8)  | 157  | 35 (22.3)  | 1.37 (0.90–2.10) |      | 99   | 17 (17.2)  | 0.88 (0.47–1.64) |      |

Abbreviations as in Table S1 and Table S4.

\*Multivariable Cox proportional-hazards regression was used with adjustment for all patient-level variables in Supplemental Table S1.



**Supplemental Table S7. Baseline Demographic and Procedural Characteristics of the Propensity-score Matched Cohorts**

| Variable                          | Matched Cohort 1       |                              | Matched Cohort 2       |                       |
|-----------------------------------|------------------------|------------------------------|------------------------|-----------------------|
|                                   | Always Users<br>n=1636 | Inconsistent Users<br>n=1636 | Always Users<br>n=1096 | Never Users<br>n=1096 |
| <b>Demographics</b>               |                        |                              |                        |                       |
| Age, mean (SD), y                 | 60.4 (8.8)             | 60.5 (9.3)                   | 61.0 (8.8)             | 61.3 (9.1)            |
| Male sex                          | 81                     | 82                           | 81                     | 81                    |
| BMI, mean (SD), kg/m <sup>2</sup> | 24.6 (2.8)             | 24.6 (2.9)                   | 25.2 (2.8)             | 25.2 (2.7)            |
| <b>Medical history</b>            |                        |                              |                        |                       |
| Smoker                            | 53                     | 54                           | 51                     | 51                    |
| Diabetes mellitus                 | 31                     | 30                           | 29                     | 30                    |
| Hypertension                      | 59                     | 58                           | 68                     | 67                    |
| Dyslipidemia                      | 66                     | 60                           | 59                     | 51                    |
| Peripheral vascular disease       | 3                      | 4                            | 5                      | 6                     |
| Previous CVA                      | 9                      | 9                            | 7                      | 6                     |
| COPD                              | 1                      | 1                            | 1                      | 2                     |
| Chronic renal failure             | 1                      | 1                            | 1                      | 1                     |
| Prior myocardial infarction       | 41                     | 41                           | 43                     | 42                    |
| Prior PCI                         | 9                      | 10                           | 8                      | 8                     |
| Prior cardiac surgery             | 1                      | 1                            | 1                      | 1                     |
| Congestive heart failure          | 5                      | 5                            | 4                      | 3                     |
| Recent atrial fibrillation        | 3                      | 3                            | 3                      | 3                     |
| LVEF, mean (SD), %                | 60 (9)                 | 60 (9)                       | 59 (8)                 | 60 (9)                |
| <b>No. of diseased vessels</b>    |                        |                              |                        |                       |
| 2                                 | 11                     | 11                           | 12                     | 12                    |
| 3                                 | 87                     | 86                           | 85                     | 84                    |
| Left main CAD                     | 32                     | 32                           | 33                     | 34                    |
| <b>Status</b>                     |                        |                              |                        |                       |
| Elective                          | 99                     | 99                           | 98                     | 98                    |
| Urgent                            | 1                      | 1                            | 2                      | 2                     |
| EuroSCORE, mean (SD)              | 2.8 (2.0)              | 2.8 (2.1)                    | 2.9 (2.0)              | 2.9 (2.1)             |
| <b>Procedural characteristics</b> |                        |                              |                        |                       |
| Grafts per patient, mean (SD), n  | 3.4 (0.9)              | 3.3 (0.9)                    | 3.3 (0.9)              | 3.1 (0.9)             |

|                                   |    |    |    |    |
|-----------------------------------|----|----|----|----|
| <b>Off-pump procedure</b>         | 57 | 61 | 75 | 81 |
| <b>LIMA-to-LAD graft</b>          | 95 | 95 | 94 | 94 |
| <b>Complete revascularization</b> | 92 | 92 | 89 | 89 |

---

Abbreviations as in Table S1.

Values expressed as percentage unless otherwise indicated.

**Supplemental Table S8. Sensitivity Analysis using  $\beta$ -Blocker Use as A Time-Dependent Covariate**

|                                  | <b>Unadjusted HR*</b><br><b>(95% CI)</b> | <b>P Value</b> | <b>Adjusted HR*</b><br><b>(95% CI)</b> | <b>P Value</b> |
|----------------------------------|------------------------------------------|----------------|----------------------------------------|----------------|
| <b>All Patients</b>              |                                          |                |                                        |                |
| <b>All-cause death</b>           | 2.04 (1.32–3.14)                         | 0.001          | 2.08 (1.30–3.33)                       | 0.002          |
| <b>Cardiac death</b>             | 2.48 (1.35–4.57)                         | 0.004          | 2.37 (1.23–4.55)                       | 0.01           |
| <b>Myocardial infarction</b>     | 1.06 (0.44–2.56)                         | 0.90           | 0.95 (0.37–2.49)                       | 0.92           |
| <b>Stroke</b>                    | 1.50 (1.19–1.89)                         | 0.006          | 1.43 (1.11–1.84)                       | 0.005          |
| <b>Repeat revascularization</b>  | 0.85 (0.55–1.30)                         | 0.45           | 0.75 (0.47–1.18)                       | 0.21           |
| <b>MACCE</b>                     | 1.37 (1.14–1.65)                         | <0.001         | 1.29 (1.05–1.57)                       | 0.01           |
| <b>Patients without Prior MI</b> |                                          |                |                                        |                |
| <b>All-cause death</b>           | 2.07 (1.16–3.70)                         | 0.01           | 2.20 (1.18–4.10)                       | 0.01           |
| <b>Cardiac death</b>             | 1.58 (0.67–3.74)                         | 0.30           | 1.63 (0.65–4.08)                       | 0.29           |
| <b>Myocardial infarction</b>     | 1.40 (0.42–4.62)                         | 0.58           | 1.08 (0.30–3.98)                       | 0.90           |
| <b>Stroke</b>                    | 1.37 (1.01–1.87)                         | 0.05           | 1.32 (0.94–1.86)                       | 0.11           |
| <b>Repeat revascularization</b>  | 0.86 (0.50–1.49)                         | 0.59           | 0.82 (0.46–1.47)                       | 0.51           |
| <b>MACCE</b>                     | 1.31 (1.02–1.67)                         | 0.03           | 1.25 (0.96–1.64)                       | 0.10           |
| <b>Patients with Prior MI</b>    |                                          |                |                                        |                |
| <b>All-cause death</b>           | 1.99 (1.03–3.83)                         | 0.04           | 1.82 (0.88–3.73)                       | 0.10           |
| <b>Cardiac death</b>             | 3.90 (1.60–9.51)                         | 0.003          | 3.05 (1.16–7.97)                       | 0.02           |
| <b>Myocardial infarction</b>     | 0.77 (0.20–2.97)                         | 0.70           | 0.74 (0.17–3.25)                       | 0.69           |
| <b>Stroke</b>                    | 1.67 (1.18–2.37)                         | 0.004          | 1.57 (1.07–2.28)                       | 0.02           |
| <b>Repeat revascularization</b>  | 0.83 (0.41–1.65)                         | 0.59           | 0.65 (0.31–1.39)                       | 0.27           |
| <b>MACCE</b>                     | 1.46 (1.10–1.94)                         | 0.008          | 1.30 (0.96–1.77)                       | 0.09           |

Abbreviations as in Table S4.

The clinical outcomes were ascertained after hospital discharge until the most recent date for which follow-up data were available.

\*The HRs were reported for patients not using  $\beta$ -blockers with users as reference. Results were adjusted for all patient-level variables in Supplemental Table S1.

*Supplemental Table S9. Sensitivity Analysis in Patients without Contraindications to  $\beta$ -Blocker Therapy*

|                                  | Always Users              | Inconsistent Users        |                          |         | Never Users               |                          |         |
|----------------------------------|---------------------------|---------------------------|--------------------------|---------|---------------------------|--------------------------|---------|
|                                  | No. of Patients/<br>n (%) | No. of Patients/<br>n (%) | Adjusted HR*<br>(95% CI) | P Value | No. of Patients/<br>n (%) | Adjusted HR*<br>(95% CI) | P Value |
| <b>All Patients</b>              | 2887                      | 1606                      |                          |         | 1145                      |                          |         |
| <b>All-cause death</b>           | 112 (3.9)                 | 105 (6.5)                 | 1.94 (1.48–2.54)         | <0.001  | 78 (6.8)                  | 1.39 (1.00–1.97)         | 0.05    |
| <b>Cardiac death</b>             | 58 (2.0)                  | 60 (3.7)                  | 2.20 (1.52–3.19)         | <0.001  | 40 (3.5)                  | 1.32 (0.81–2.16)         | 0.26    |
| <b>Myocardial infarction</b>     | 37 (1.3)                  | 15 (0.9)                  | 0.82 (0.44–1.53)         | 0.52    | 19 (1.7)                  | 0.98 (0.47–2.04)         | 0.95    |
| <b>Stroke</b>                    | 233 (8.1)                 | 137 (8.5)                 | 1.21 (0.97–1.50)         | 0.09    | 137 (12.0)                | 1.24 (0.95–1.61)         | 0.12    |
| <b>Repeat revascularization</b>  | 99 (3.4)                  | 40 (2.5)                  | 0.66 (0.45–0.97)         | 0.03    | 53 (4.6)                  | 0.82 (0.52–1.30)         | 0.40    |
| <b>MACCE</b>                     | 431 (14.9)                | 277 (17.2)                | 1.19 (0.98–1.44)         | 0.09    | 255 (22.3)                | 1.29 (1.11–1.51)         | 0.001   |
| <b>Patients without Prior MI</b> | 1630                      | 950                       |                          |         | 672                       |                          |         |
| <b>All-cause death</b>           | 62 (3.8)                  | 56 (5.9)                  | 1.70 (1.17–2.48)         | 0.006   | 43 (6.4)                  | 1.29 (0.79–2.11)         | 0.30    |
| <b>Cardiac death</b>             | 33 (2.0)                  | 28 (2.9)                  | 1.75 (1.03–2.97)         | 0.04    | 17 (2.5)                  | 0.95 (0.45–2.03)         | 0.90    |
| <b>Myocardial infarction</b>     | 15 (0.9)                  | 9 (0.9)                   | 1.08 (0.44–2.66)         | 0.86    | 12 (1.8)                  | 1.28 (0.41–3.95)         | 0.67    |
| <b>Stroke</b>                    | 131 (8.0)                 | 82 (8.6)                  | 1.21 (0.91–1.61)         | 0.19    | 76 (11.3)                 | 1.16 (0.81–1.67)         | 0.41    |
| <b>Repeat revascularization</b>  | 53 (3.3)                  | 25 (2.6)                  | 0.69 (0.42–1.14)         | 0.15    | 40 (6.0)                  | 1.08 (0.60–1.95)         | 0.80    |
| <b>MACCE</b>                     | 238 (14.6)                | 160 (16.8)                | 1.20 (0.92–1.56)         | 0.18    | 150 (22.3)                | 1.24 (1.00–1.52)         | 0.04    |
| <b>Patients with Prior MI</b>    | 1257                      | 656                       |                          |         | 473                       |                          |         |
| <b>All-cause death</b>           | 50 (4.0)                  | 49 (7.5)                  | 2.14 (1.42–3.21)         | <0.001  | 35 (7.4)                  | 1.45 (0.86–2.43)         | 0.17    |
| <b>Cardiac death</b>             | 25 (2.0)                  | 32 (4.9)                  | 1.86 (0.94–3.70)         | 0.08    | 23 (4.9)                  | 2.93 (1.70–5.06)         | <0.001  |

|                                 |            |            |                  |      |            |                  |      |
|---------------------------------|------------|------------|------------------|------|------------|------------------|------|
| <b>Myocardial infarction</b>    | 22 (1.8)   | 6 (0.9)    | 0.72 (0.29–1.82) | 0.49 | 7 (1.5)    | 0.85 (0.29–2.45) | 0.76 |
| <b>Stroke</b>                   | 102 (8.1)  | 55 (8.4)   | 1.20 (0.85–1.67) | 0.30 | 61 (12.9)  | 1.36 (0.92–2.02) | 0.13 |
| <b>Repeat revascularization</b> | 46 (3.7)   | 15 (2.3)   | 0.64 (0.35–1.17) | 0.15 | 13 (2.7)   | 0.50 (0.23–1.08) | 0.08 |
| <b>MACCE</b>                    | 193 (15.4) | 117 (17.8) | 1.14 (0.85–1.53) | 0.39 | 105 (22.2) | 1.35 (1.07–1.71) | 0.01 |

Abbreviations as in Table S4.

\*Multivariable Cox proportional-hazards regression was used with adjustment for all patient-level variables in Supplemental Table S1.

## Supplemental Figures

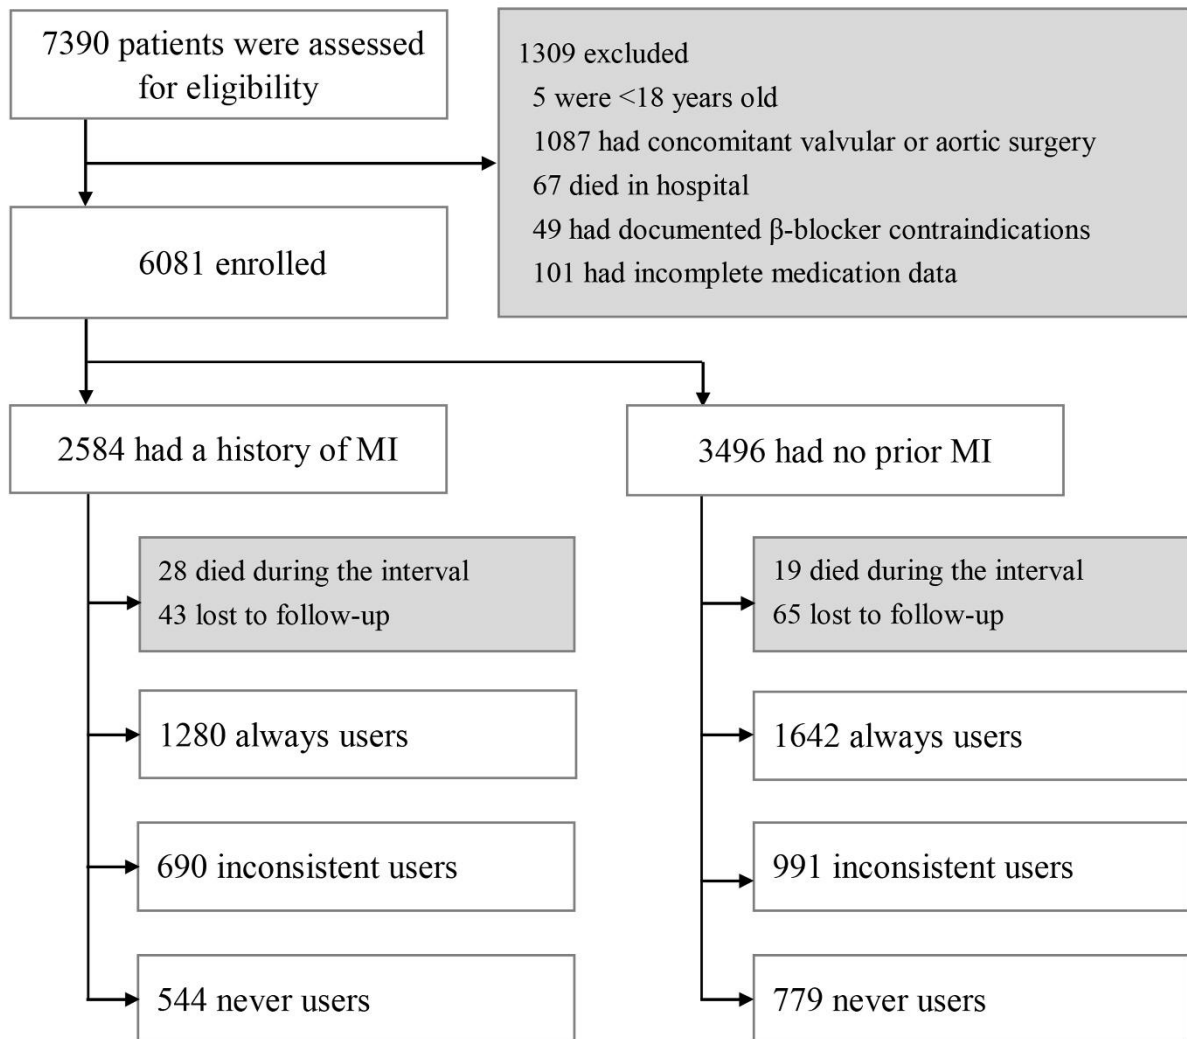

**Figure S1**

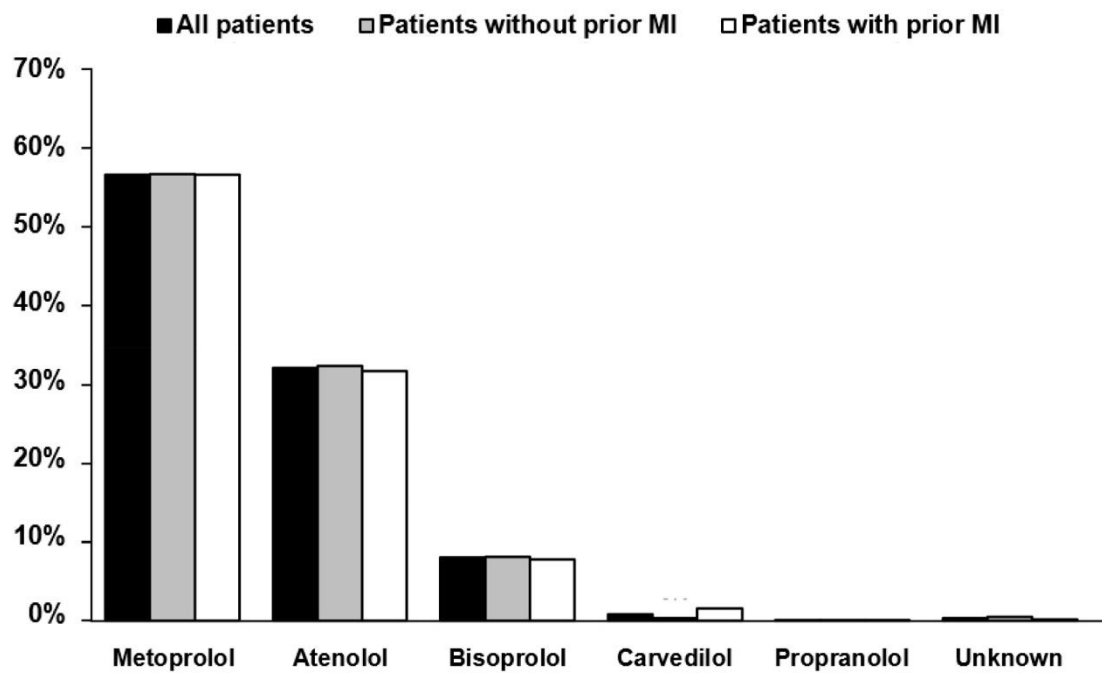

Figure S2

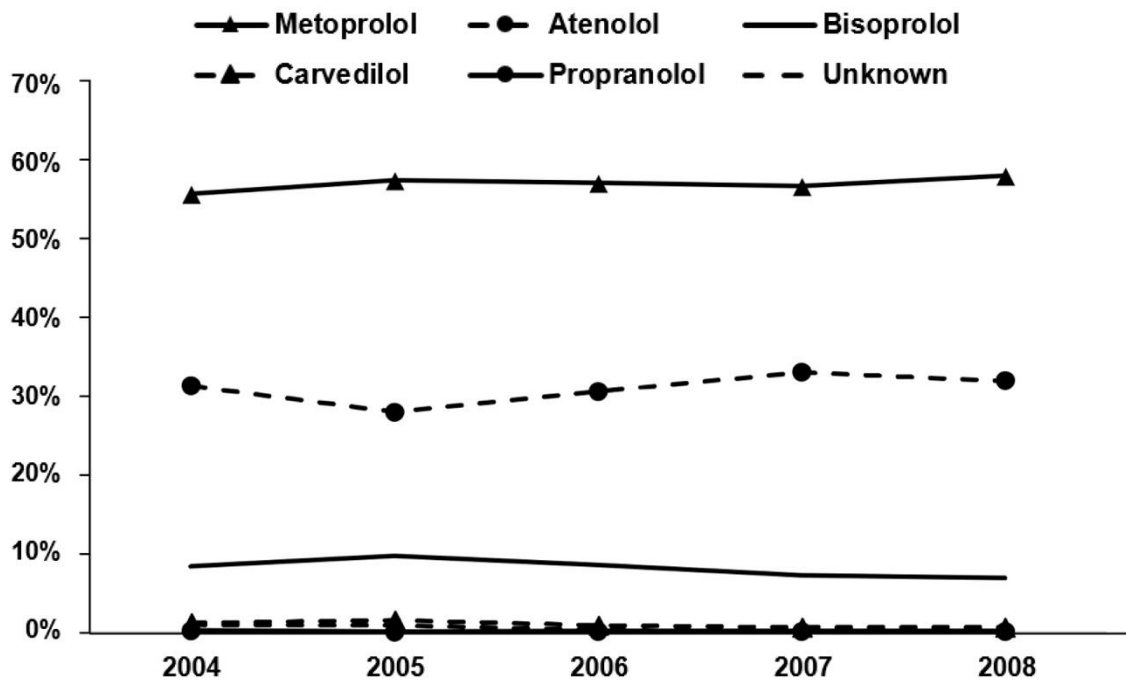

Figure S3



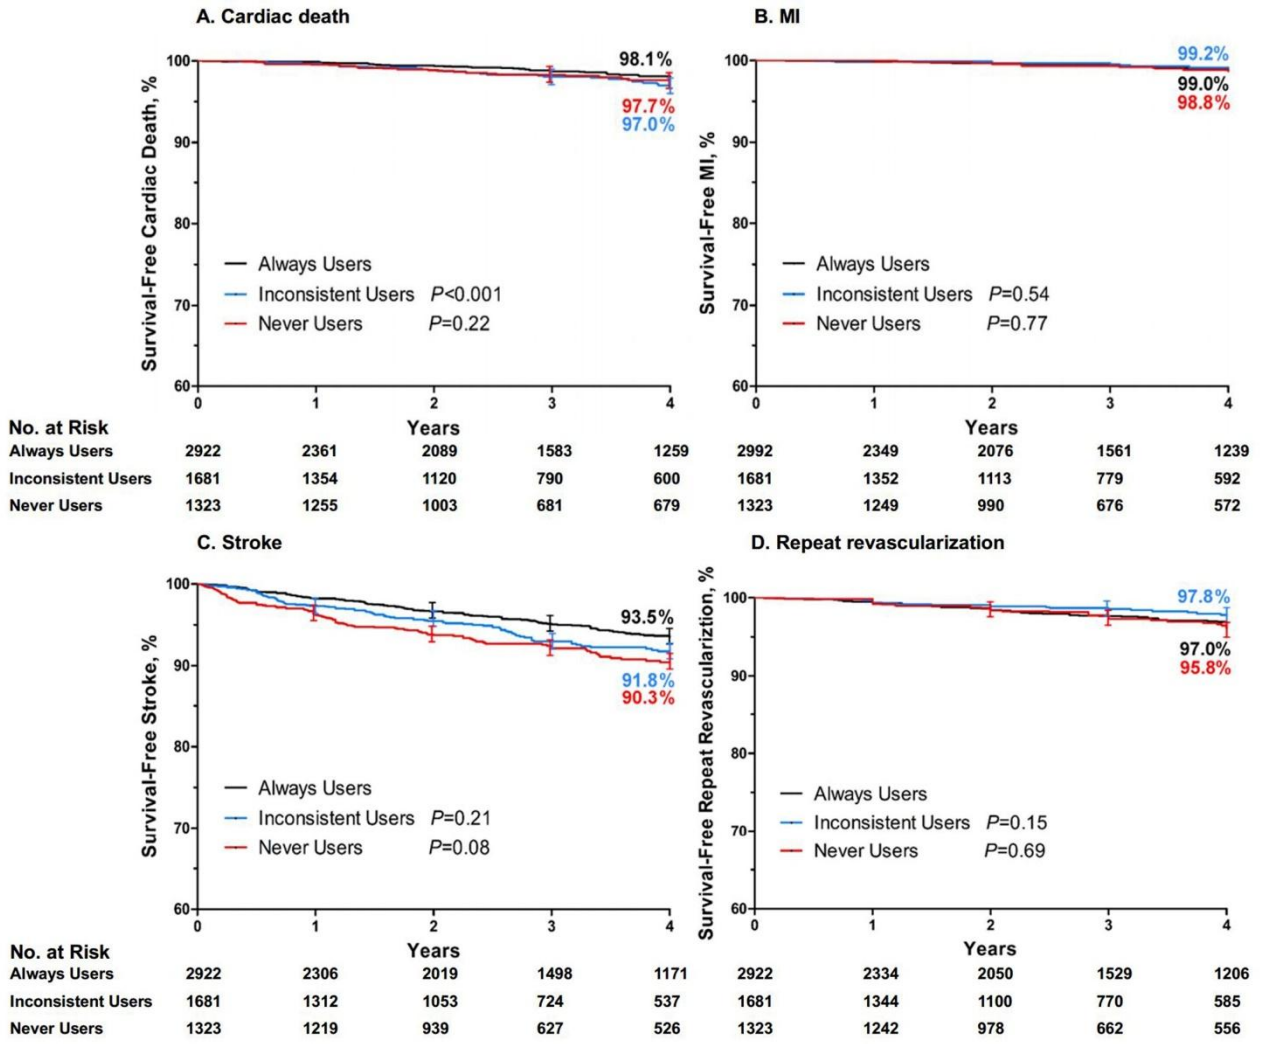

**Figure S4**

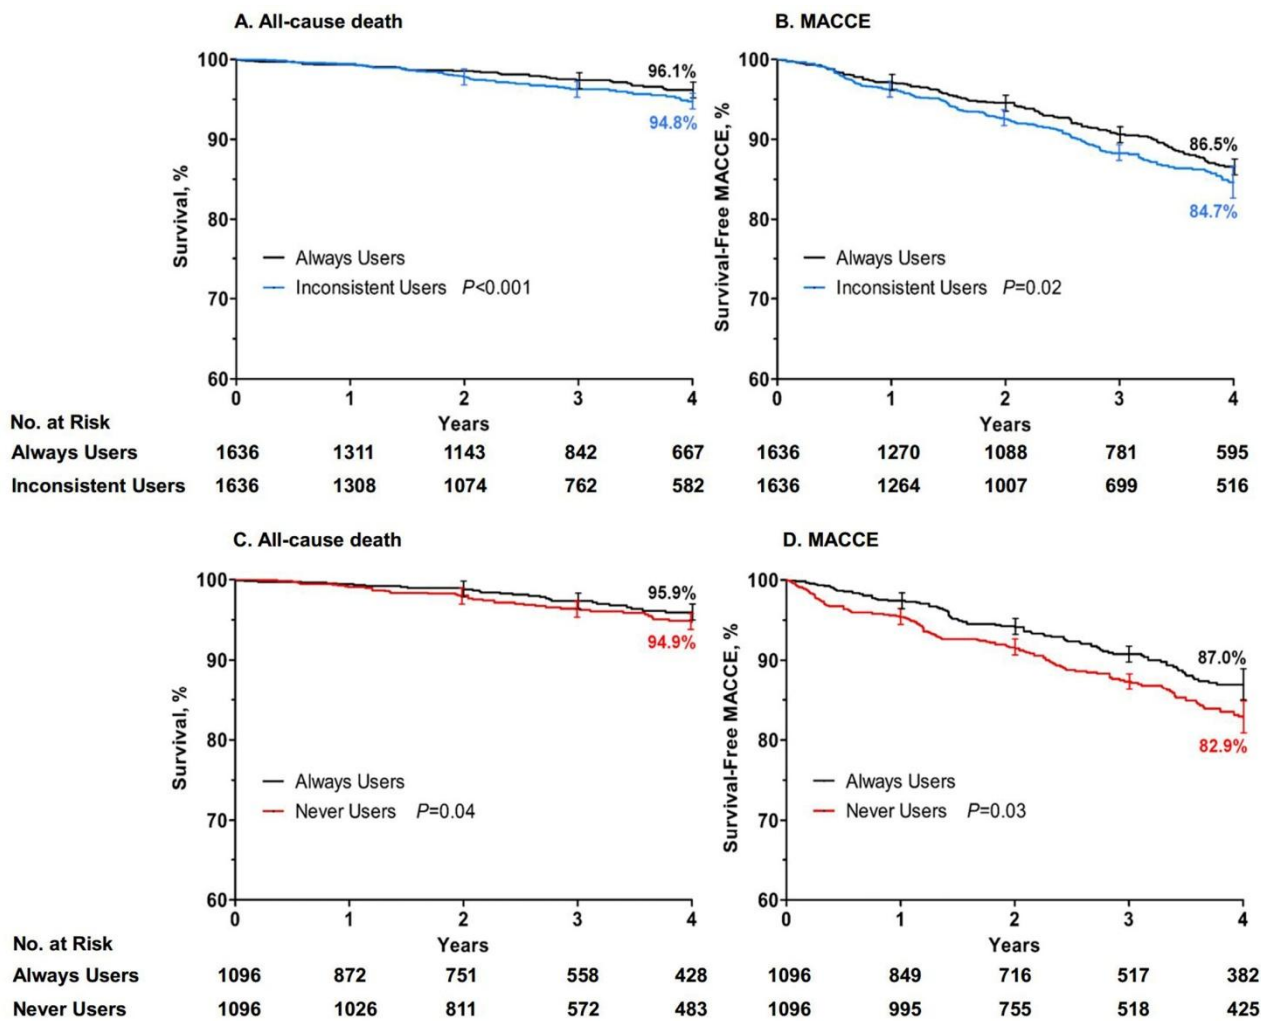

Figure S5
